# Supplementary material for: Angebote zur Prävention von sozialer Isolation und Einsamkeit bei älteren Menschen im ländlichen Raum
Source: Springer Nature journal article supplement (doi:10.1007/s11553-023-01025-8), 2023-03-15
Supplement: MOESM1 [file 24627352]

Möchten Sie Ihren Alltag in [REDACTED]  
verbessern?

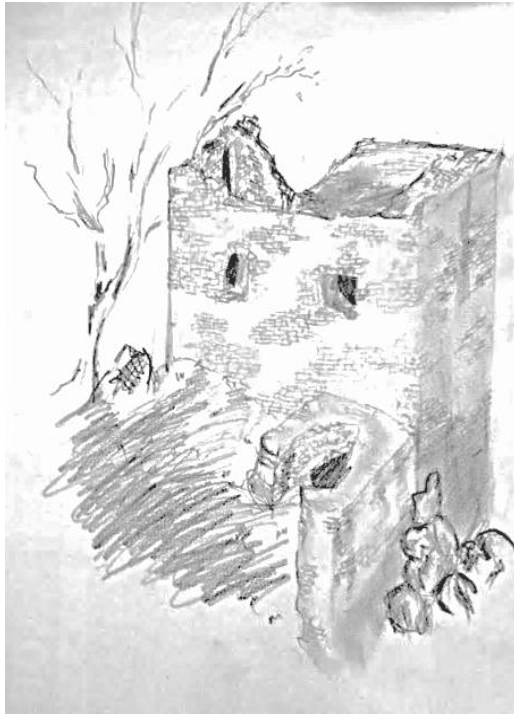

Befragung  
der Einwohnerinnen und Einwohner  
der Gemeinde [REDACTED] ab 65 Jahren

Sehr geehrte Damen und Herren,

wir freuen uns über Ihre Teilnahme an der Befragung. Auf der rechten Seite finden Sie noch einige Hinweise zum Ausfüllen des Fragebogens.

Ihre Teilnahme ist freiwillig! Alle von Ihnen angegebenen Daten werden anonym und vertraulich behandelt!

Wenn Sie den Fragebogen ausgefüllt haben, stecken Sie ihn bitte in den beigegefügtten Briefumschlag (Beschriftung „FRAGEBOGEN“). Sie können den Fragebogen entweder bei einer der im Anschreiben genannten Kontaktpersonen abgeben, ihn in eine der Sammelboxen werfen, die in den genannten Geschäften und auf der Informationsveranstaltung am 29.01.2020 in [REDACTED] bereitstehen, oder in den Briefkasten des Rathauses [REDACTED] einwerfen.

### **Abgabeschluss ist der 29.01.2020!**

Falls Sie Fragen haben oder Unterstützung beim Ausfüllen wünschen, wenden Sie sich gerne an das Rathaus [REDACTED].

Mit freundlichen Grüßen

[REDACTED] – Bürgermeister  
[REDACTED] – Gesundheitsbotschafterin  
[REDACTED] – Studentin; Durchführung und  
Auswertung der Befragung

## Hinweise zum Ausfüllen des Fragebogens

| <p>Bitte beantworten Sie die Fragen möglichst der Reihe nach. Lassen Sie Fragen aus, die Sie nicht beantworten möchten oder können.</p>                                                                                                                                                                                                                                                                                                                                                                                                                                                                                                                                                                                                                   |                                                                                                                   |                                     |                          |                          |                 |                       |                                     |                          |                          |                          |                          |                          |                                     |                          |                          |                                                                                                                                    |
|-----------------------------------------------------------------------------------------------------------------------------------------------------------------------------------------------------------------------------------------------------------------------------------------------------------------------------------------------------------------------------------------------------------------------------------------------------------------------------------------------------------------------------------------------------------------------------------------------------------------------------------------------------------------------------------------------------------------------------------------------------------|-------------------------------------------------------------------------------------------------------------------|-------------------------------------|--------------------------|--------------------------|-----------------|-----------------------|-------------------------------------|--------------------------|--------------------------|--------------------------|--------------------------|--------------------------|-------------------------------------|--------------------------|--------------------------|------------------------------------------------------------------------------------------------------------------------------------|
| <p><input type="checkbox"/> ja <span style="margin-left: 100px;"><input checked="" type="checkbox"/> nein</span></p>                                                                                                                                                                                                                                                                                                                                                                                                                                                                                                                                                                                                                                      | <p>Bitte kreuzen Sie das Kästchen bei der für Sie zutreffenden Antwort deutlich an.</p>                           |                                     |                          |                          |                 |                       |                                     |                          |                          |                          |                          |                          |                                     |                          |                          |                                                                                                                                    |
|                                                                                                                                                                                                                                                                                                                                                                                                                                                                                                                                                                                                                                                                          | <p>Um Antworten zu korrigieren, schwärzen Sie das versehentlich gesetzte Kreuz deutlich und setzen ein neues.</p> |                                     |                          |                          |                 |                       |                                     |                          |                          |                          |                          |                          |                                     |                          |                          |                                                                                                                                    |
| <p><i>Bitte nur ein Kreuz!</i></p>                                                                                                                                                                                                                                                                                                                                                                                                                                                                                                                                                                                                                                                                                                                        | <p>Bitte entscheiden Sie sich für <u>eine</u> Antwort.</p>                                                        |                                     |                          |                          |                 |                       |                                     |                          |                          |                          |                          |                          |                                     |                          |                          |                                                                                                                                    |
| <p><i>Mehrfachnennungen möglich!</i></p>                                                                                                                                                                                                                                                                                                                                                                                                                                                                                                                                                                                                                                                                                                                  | <p>Bitte wählen Sie alle Antworten aus, die auf Sie zutreffenden.</p>                                             |                                     |                          |                          |                 |                       |                                     |                          |                          |                          |                          |                          |                                     |                          |                          |                                                                                                                                    |
| <table border="1" style="width: 100%; border-collapse: collapse; text-align: center;"> <thead> <tr> <th style="width: 20%;"></th> <th style="width: 15%;">Stimme zu</th> <th style="width: 15%;">Stimme eher zu</th> <th style="width: 15%;">Stimme eher nicht zu</th> <th style="width: 15%;">Stimme nicht zu</th> </tr> </thead> <tbody> <tr> <td>Essen in Gesellschaft</td> <td><input checked="" type="checkbox"/></td> <td><input type="checkbox"/></td> <td><input type="checkbox"/></td> <td><input type="checkbox"/></td> </tr> <tr> <td>Gemeinsames Spaziergehen</td> <td><input type="checkbox"/></td> <td><input checked="" type="checkbox"/></td> <td><input type="checkbox"/></td> <td><input type="checkbox"/></td> </tr> </tbody> </table> |                                                                                                                   | Stimme zu                           | Stimme eher zu           | Stimme eher nicht zu     | Stimme nicht zu | Essen in Gesellschaft | <input checked="" type="checkbox"/> | <input type="checkbox"/> | <input type="checkbox"/> | <input type="checkbox"/> | Gemeinsames Spaziergehen | <input type="checkbox"/> | <input checked="" type="checkbox"/> | <input type="checkbox"/> | <input type="checkbox"/> | <p>Finden Sie die Antwortmöglichkeiten in einer Tabelle mit einer Skala, dann setzen Sie <u>pro Zeile</u> bitte nur ein Kreuz.</p> |
|                                                                                                                                                                                                                                                                                                                                                                                                                                                                                                                                                                                                                                                                                                                                                           | Stimme zu                                                                                                         | Stimme eher zu                      | Stimme eher nicht zu     | Stimme nicht zu          |                 |                       |                                     |                          |                          |                          |                          |                          |                                     |                          |                          |                                                                                                                                    |
| Essen in Gesellschaft                                                                                                                                                                                                                                                                                                                                                                                                                                                                                                                                                                                                                                                                                                                                     | <input checked="" type="checkbox"/>                                                                               | <input type="checkbox"/>            | <input type="checkbox"/> | <input type="checkbox"/> |                 |                       |                                     |                          |                          |                          |                          |                          |                                     |                          |                          |                                                                                                                                    |
| Gemeinsames Spaziergehen                                                                                                                                                                                                                                                                                                                                                                                                                                                                                                                                                                                                                                                                                                                                  | <input type="checkbox"/>                                                                                          | <input checked="" type="checkbox"/> | <input type="checkbox"/> | <input type="checkbox"/> |                 |                       |                                     |                          |                          |                          |                          |                          |                                     |                          |                          |                                                                                                                                    |
| <p><i>Ich finde, dass</i><br/>.....</p>                                                                                                                                                                                                                                                                                                                                                                                                                                                                                                                                                                                                                                                                                                                   | <p>Diese Linien sind für Ihre eigene Antwort gedacht. Schreiben Sie bitte möglichst leserlich.</p>                |                                     |                          |                          |                 |                       |                                     |                          |                          |                          |                          |                          |                                     |                          |                          |                                                                                                                                    |
| <p><input type="checkbox"/> Sonstiges, und zwar:<br/>.....</p>                                                                                                                                                                                                                                                                                                                                                                                                                                                                                                                                                                                                                                                                                            | <p>Bei diesem Hinweis können Sie zusätzlich eine eigene Antwort angeben.</p>                                      |                                     |                          |                          |                 |                       |                                     |                          |                          |                          |                          |                          |                                     |                          |                          |                                                                                                                                    |

# Fragebogen

**1. Ich wohne seit .....** (*Jahreszahl eintragen*) **in der Gemeinde** ■■■■.

**2. Ich wohne in einem:**  
(*Bitte nur ein Kreuz!*)

- |                                           |                                               |
|-------------------------------------------|-----------------------------------------------|
| <input type="checkbox"/> Einfamilienhaus  | <input type="checkbox"/> Seniorenheim         |
| <input type="checkbox"/> Zweifamilienhaus | <input type="checkbox"/> Sonstiges, und zwar: |
| <input type="checkbox"/> Mehrfamilienhaus | .....                                         |

**3. Mit mir im selben Haus wohnt/wohnen:**  
(*Mehrfachnennungen möglich!*)

- |                                                   |                                                |
|---------------------------------------------------|------------------------------------------------|
| <input type="checkbox"/> Mein(e) (Ehe)Partner(in) | <input type="checkbox"/> Freunde/-innen,       |
| <input type="checkbox"/> Mein(e) Kind(er)         | <input type="checkbox"/> Nachbarn/-innen       |
| <input type="checkbox"/> Mein(e) Enkelkind(er)    | <input type="checkbox"/> Bekannte              |
| <input type="checkbox"/> Mein(e) Geschwister      | <input type="checkbox"/> Meine(e) Haustiere(e) |
| <input type="checkbox"/> Meine Eltern             | <input type="checkbox"/> Niemand               |
| <input type="checkbox"/> Andere Verwandte         | <input type="checkbox"/> Sonstiges, und zwar:  |
|                                                   | .....                                          |

**4. Ich habe Kinder:**  
(*Bitte nur ein Kreuz!*)

- |                             |                               |
|-----------------------------|-------------------------------|
| <input type="checkbox"/> Ja | <input type="checkbox"/> Nein |
|-----------------------------|-------------------------------|

**5. Familienangehörige, die nicht mit mir im selben Haus, sondern außerhalb wohnen, treffe ich:**

*(Bitte nur ein Kreuz!)*

- (Mehrere) täglich
- Wöchentlich
- Monatlich oder seltener
- Nie
- Ich habe keine

**6. Zu diesen Personen aus meinem Familien- und Bekanntenkreis habe ich 14-tägig normalerweise mindestens einmal Kontakt, d.h. ich führe mit ihnen ein persönliches oder telefonisches Gespräch:**

*(Mehrfachnennungen möglich!)*

- Ehe- oder Lebenspartner/-in
- Eigene Kinder
- Enkelkinder oder andere Verwandte
- Freunden/-innen/Bekanntem/Vereinskollegen/-innen
- Nachbarn/-innen
- Niemand
- Sonstige, und zwar:

.....  
.....

**7. Zu diesen Personen aus dem öffentlichen Bereich habe ich 14-tägig normalerweise mindestens einmal Kontakt, d.h. ich führe mit ihnen ein persönliches oder telefonisches Gespräch:**

*(Mehrfachnennungen möglich!)*

- Arzt/Ärztin
- Pflegekräfte/Mitarbeitende eines ambulanten Dienstes
- Pfarrer/-in oder Mitglieder einer Kirchengemeinde
- Friseur/-in
- Verkäufer/-in
- Niemand
- Sonstige, und zwar:

.....  
.....

**8. Einsam fühle ich mich ...**

*(Bitte nur ein Kreuz!)*

- Selten oder nie
- Manchmal
- Oft

**9. Ich möchte häufiger unter Leute kommen.**

*(Bitte nur ein Kreuz!)*

- Stimme voll zu
- Stimme eher zu
- Stimmer eher nicht zu
- Stimme gar nicht zu

**10. Meiner Meinung nach gibt es genügend  
gesellschaftliche/gesellige Angebote für  
Seniorinnen und Senioren in der Gemeinde**

■:

*(Bitte nur ein Kreuz!)*

Ja

Nein

**11. Mit den aufgeführten Angeboten der Gemeinde  
 ■ bin ich wie folgt zufrieden:**

|                            | Sehr<br>zufrieden        | Zufrieden                | Unzufrieden              | Sehr<br>unzufrieden      |
|----------------------------|--------------------------|--------------------------|--------------------------|--------------------------|
| Einkaufsmöglichkeiten      | <input type="checkbox"/> | <input type="checkbox"/> | <input type="checkbox"/> | <input type="checkbox"/> |
| Freizeitangebote           | <input type="checkbox"/> | <input type="checkbox"/> | <input type="checkbox"/> | <input type="checkbox"/> |
| Kulturangebote             | <input type="checkbox"/> | <input type="checkbox"/> | <input type="checkbox"/> | <input type="checkbox"/> |
| Ärztliche Versorgung       | <input type="checkbox"/> | <input type="checkbox"/> | <input type="checkbox"/> | <input type="checkbox"/> |
| Versorgung durch Apotheken | <input type="checkbox"/> | <input type="checkbox"/> | <input type="checkbox"/> | <input type="checkbox"/> |
| Notdienst der Ärzte        | <input type="checkbox"/> | <input type="checkbox"/> | <input type="checkbox"/> | <input type="checkbox"/> |
| Notdienst der Apotheken    | <input type="checkbox"/> | <input type="checkbox"/> | <input type="checkbox"/> | <input type="checkbox"/> |
| Öffentliche Verkehrsmittel | <input type="checkbox"/> | <input type="checkbox"/> | <input type="checkbox"/> | <input type="checkbox"/> |
| Gaststätten                | <input type="checkbox"/> | <input type="checkbox"/> | <input type="checkbox"/> | <input type="checkbox"/> |



|                                                                            | Sehr zufrieden           | Zufrieden                | Unzufrieden              | Sehr unzufrieden         |
|----------------------------------------------------------------------------|--------------------------|--------------------------|--------------------------|--------------------------|
| Öffnungszeiten des Rathauses                                               | <input type="checkbox"/> | <input type="checkbox"/> | <input type="checkbox"/> | <input type="checkbox"/> |
| Bisherige Angebote der Gemeinde, z.B. Seniorennachmittage, -ausflüge, etc. | <input type="checkbox"/> | <input type="checkbox"/> | <input type="checkbox"/> | <input type="checkbox"/> |
| Sonstiges, und zwar:                                                       | <input type="checkbox"/> | <input type="checkbox"/> | <input type="checkbox"/> | <input type="checkbox"/> |
| .....                                                                      |                          |                          |                          |                          |
| .....                                                                      |                          |                          |                          |                          |
| .....                                                                      |                          |                          |                          |                          |

**12. Folgende Angebote könnten mich dabei unterstützen, Kontakte zu pflegen oder neue Kontakte zu knüpfen:**

|                                                                                                     | Stimme zu                | Stimme eher zu           | Stimme eher nicht zu     | Stimme nicht zu          |
|-----------------------------------------------------------------------------------------------------|--------------------------|--------------------------|--------------------------|--------------------------|
| Essen in Gesellschaft                                                                               | <input type="checkbox"/> | <input type="checkbox"/> | <input type="checkbox"/> | <input type="checkbox"/> |
| Gemeinsames Spaziergehen                                                                            | <input type="checkbox"/> | <input type="checkbox"/> | <input type="checkbox"/> | <input type="checkbox"/> |
| Gemeinsames Musizieren, Singen                                                                      | <input type="checkbox"/> | <input type="checkbox"/> | <input type="checkbox"/> | <input type="checkbox"/> |
| Tanzabende                                                                                          | <input type="checkbox"/> | <input type="checkbox"/> | <input type="checkbox"/> | <input type="checkbox"/> |
| Weiterbildungskurse (z.B. Fremdsprachen, Umgang mit Internet oder Handy)                            | <input type="checkbox"/> | <input type="checkbox"/> | <input type="checkbox"/> | <input type="checkbox"/> |
| Unterstützungsgruppe, in der man anderen Personen seine Hilfe anbieten und/oder Hilfe bekommen kann | <input type="checkbox"/> | <input type="checkbox"/> | <input type="checkbox"/> | <input type="checkbox"/> |
| Gemeinsame Bewegung/Sport                                                                           | <input type="checkbox"/> | <input type="checkbox"/> | <input type="checkbox"/> | <input type="checkbox"/> |

|                                                     | Stimme zu                | Stimme eher zu           | Stimme eher nicht zu     | Stimme nicht zu          |
|-----------------------------------------------------|--------------------------|--------------------------|--------------------------|--------------------------|
| Gesellschaftsspiele spielen                         | <input type="checkbox"/> | <input type="checkbox"/> | <input type="checkbox"/> | <input type="checkbox"/> |
| Gemeinsames Kochen                                  | <input type="checkbox"/> | <input type="checkbox"/> | <input type="checkbox"/> | <input type="checkbox"/> |
| Ausflüge                                            | <input type="checkbox"/> | <input type="checkbox"/> | <input type="checkbox"/> | <input type="checkbox"/> |
| Informationsveranstaltungen zu verschiedenen Themen | <input type="checkbox"/> | <input type="checkbox"/> | <input type="checkbox"/> | <input type="checkbox"/> |
| Bastel-/Malangebote                                 | <input type="checkbox"/> | <input type="checkbox"/> | <input type="checkbox"/> | <input type="checkbox"/> |
| Gartenarbeit in Gesellschaft                        | <input type="checkbox"/> | <input type="checkbox"/> | <input type="checkbox"/> | <input type="checkbox"/> |
| Handwerkliche Tätigkeiten in Gesellschaft           | <input type="checkbox"/> | <input type="checkbox"/> | <input type="checkbox"/> | <input type="checkbox"/> |
| Gottesdienstbesuche, Nutzen kirchlicher Angebote    | <input type="checkbox"/> | <input type="checkbox"/> | <input type="checkbox"/> | <input type="checkbox"/> |
| Filmabende                                          | <input type="checkbox"/> | <input type="checkbox"/> | <input type="checkbox"/> | <input type="checkbox"/> |
| Sonstige, und zwar:                                 | <input type="checkbox"/> | <input type="checkbox"/> | <input type="checkbox"/> | <input type="checkbox"/> |
| .....                                               |                          |                          |                          |                          |
| .....                                               |                          |                          |                          |                          |
| .....                                               |                          |                          |                          |                          |

**13. Mein Gesundheitszustand im Allgemeinen ist:**

*(Bitte nur ein Kreuz!)*

- Sehr gut
- Gut
- Mittelmäßig
- Schlecht
- Sehr schlecht

**14. In meinem Alltag bin ich auf Geh- oder  
Mobilitätshilfen angewiesen:**

- Nein
- Ja, und zwar auf:

*(Mehrfachnennungen möglich!)*

- Gehstock oder Gehhilfen („Krücken“)
- Rollator
- Rollstuhl (mechanisch)
- Rollstuhl (elektrisch)
- Elektromobil für Senioren/-innen
- Behindertengerechtes Auto
- Sonstiges, und zwar:

.....

**15. Für gewöhnlich verlasse ich mein Haus/ meine Wohnung:**

*(Bitte nur ein Kreuz!)*

- Täglich
- Mehrmals pro Woche, aber nicht täglich
- Einmal pro Woche, aber nicht häufiger
- Seltener als einmal pro Woche

**16. Im Alltag verlasse ich mein Zuhause, um folgenden Erledigungen/Aktivitäten nachzugehen:**

.....

.....

.....

**17. Im Alltag hindern mich folgende Gegebenheiten/ Situationen daran, mein Zuhause für Erledigungen/Aktivitäten zu verlassen:**

.....

.....

.....

**18. Diese Verkehrsmittel benutze ich zur Erledigung der alltäglichen Besorgungen, wie z.B. Einkaufen, Arztbesuche, Apotheken, in der Freizeit, bei Kulturangeboten und dem Besuch von Freunden und Bekannten:**

|                                    | Sehr häufig              | Häufig                   | Gelegentlich             | Nie                      |
|------------------------------------|--------------------------|--------------------------|--------------------------|--------------------------|
| Ich gehe zu Fuß.                   | <input type="checkbox"/> | <input type="checkbox"/> | <input type="checkbox"/> | <input type="checkbox"/> |
| Fahrrad                            | <input type="checkbox"/> | <input type="checkbox"/> | <input type="checkbox"/> | <input type="checkbox"/> |
| Rollstuhl                          | <input type="checkbox"/> | <input type="checkbox"/> | <input type="checkbox"/> | <input type="checkbox"/> |
| Eigenes Auto                       | <input type="checkbox"/> | <input type="checkbox"/> | <input type="checkbox"/> | <input type="checkbox"/> |
| Ich werde von Anderen mitgenommen. | <input type="checkbox"/> | <input type="checkbox"/> | <input type="checkbox"/> | <input type="checkbox"/> |
| Öffentliche Verkehrsmittel         | <input type="checkbox"/> | <input type="checkbox"/> | <input type="checkbox"/> | <input type="checkbox"/> |
| Taxi                               | <input type="checkbox"/> | <input type="checkbox"/> | <input type="checkbox"/> | <input type="checkbox"/> |
| Sonstige, und zwar:                | <input type="checkbox"/> | <input type="checkbox"/> | <input type="checkbox"/> | <input type="checkbox"/> |
| .....                              |                          |                          |                          |                          |
| .....                              |                          |                          |                          |                          |
| .....                              |                          |                          |                          |                          |

## 19. Meine Freizeit gestalte ich mit:

*(Mehrfachnennungen möglich!)*

- Sportlicher Betätigung
- Spaziergehen
- Kurse besuchen/weiterbilden
- Gartenarbeit
- Ehrenamtlicher Tätigkeit
- Busreisen/Tagesausflüge
- Treffen mit Freunden/-innen/Bekanntem
- Besuch kultureller Veranstaltungen  
(z.B. Theater, Kino, Museum, Konzerte)
- Vereinstätigkeit
- Zeitung/Bücher lesen
- Telefonieren
- Hausarbeit
- Betreuung von Familienangehörigen  
(z.B. Partner/in, Enkelkinder)
- Handwerklichen Tätigkeiten
- Basteln
- Grabpflege
- Sonstigem, und zwar:

.....  
.....

**20. Folgende Angebote würde ich gerne nutzen, wenn Sie hier in der Gemeinde [ ] angeboten würden:**

|                                                                                                     | Stimme zu                | Stimme eher zu           | Stimme eher nicht zu     | Stimme nicht zu          |
|-----------------------------------------------------------------------------------------------------|--------------------------|--------------------------|--------------------------|--------------------------|
| Essen in Gesellschaft                                                                               | <input type="checkbox"/> | <input type="checkbox"/> | <input type="checkbox"/> | <input type="checkbox"/> |
| Gemeinsames Spaziergehen                                                                            | <input type="checkbox"/> | <input type="checkbox"/> | <input type="checkbox"/> | <input type="checkbox"/> |
| Gemeinsames Musizieren, Singen                                                                      | <input type="checkbox"/> | <input type="checkbox"/> | <input type="checkbox"/> | <input type="checkbox"/> |
| Tanzabende                                                                                          | <input type="checkbox"/> | <input type="checkbox"/> | <input type="checkbox"/> | <input type="checkbox"/> |
| Weiterbildungskurse (z.B. Fremdsprachen, Umgang mit Internet oder Handy)                            | <input type="checkbox"/> | <input type="checkbox"/> | <input type="checkbox"/> | <input type="checkbox"/> |
| Unterstützungsgruppe, in der man anderen Personen seine Hilfe anbieten und/oder Hilfe bekommen kann | <input type="checkbox"/> | <input type="checkbox"/> | <input type="checkbox"/> | <input type="checkbox"/> |
| Gemeinsame Bewegung/ Sport                                                                          | <input type="checkbox"/> | <input type="checkbox"/> | <input type="checkbox"/> | <input type="checkbox"/> |



|                                                     | Stimme zu                | Stimme eher zu           | Stimme eher nicht zu     | Stimme nicht zu          |
|-----------------------------------------------------|--------------------------|--------------------------|--------------------------|--------------------------|
| Gesellschaftsspiele                                 | <input type="checkbox"/> | <input type="checkbox"/> | <input type="checkbox"/> | <input type="checkbox"/> |
| Gemeinsames Kochen                                  | <input type="checkbox"/> | <input type="checkbox"/> | <input type="checkbox"/> | <input type="checkbox"/> |
| Ausflüge                                            | <input type="checkbox"/> | <input type="checkbox"/> | <input type="checkbox"/> | <input type="checkbox"/> |
| Informationsveranstaltungen zu verschiedenen Themen | <input type="checkbox"/> | <input type="checkbox"/> | <input type="checkbox"/> | <input type="checkbox"/> |
| Bastel-/Malangebote                                 | <input type="checkbox"/> | <input type="checkbox"/> | <input type="checkbox"/> | <input type="checkbox"/> |
| Gartenarbeit in Gesellschaft                        | <input type="checkbox"/> | <input type="checkbox"/> | <input type="checkbox"/> | <input type="checkbox"/> |
| Handwerkliche Tätigkeiten in Gesellschaft           | <input type="checkbox"/> | <input type="checkbox"/> | <input type="checkbox"/> | <input type="checkbox"/> |
| Gottesdienstbesuche, Nutzen kirchlicher Angebote    | <input type="checkbox"/> | <input type="checkbox"/> | <input type="checkbox"/> | <input type="checkbox"/> |
| Filmabende                                          | <input type="checkbox"/> | <input type="checkbox"/> | <input type="checkbox"/> | <input type="checkbox"/> |
| Sonstige, und zwar:                                 | <input type="checkbox"/> | <input type="checkbox"/> | <input type="checkbox"/> | <input type="checkbox"/> |
| .....                                               |                          |                          |                          |                          |
| .....                                               |                          |                          |                          |                          |
| .....                                               |                          |                          |                          |                          |

*Aus statistischen Gründen benötigen wir folgende Angaben zu Ihrer Person:*

**21. Ich wurde im Jahr 19..... (Jahreszahl eintragen) geboren.**

**22. Mein Geschlecht ist:**  
*(Bitte nur ein Kreuz!)*

- Männlich       Weiblich       Divers

**23. Insgesamt besuchte ich für ..... Jahre die Schule, Hochschule oder eine andere schulische Ausbildung (ohne betriebliche Ausbildung).**

**24. Mein Erwerbsstatus beschreibt sich am besten mit: (Mehrfachnennungen möglich!)**

- Ich bin in Vollzeit erwerbstätig.
- Ich bin in Teilzeit erwerbstätig.
- Ich bin Hausfrau/-mann.
- Ich arbeite in Altersteilzeit.
- Ich bin im Vorruhestand.
- Ich bin im Ruhestand/in Rente.
- Ich gehe einem Minijob/450-Euro-Job nach.
- Ich bin arbeitssuchend.
- Sonstiges, und zwar:

.....

**25. Die Bezeichnung der Tätigkeit/des Berufes, in welchem ich zuletzt tätig war, bzw. tätig bin (bei aktueller Erwerbstätigkeit) lautet:**

.....  
.....

**26. Derzeit beziehe ich staatliche Leistungen:**

- Nein
- Ja, und zwar:  
*(Mehrfachnennungen möglich!)*
  - Rente der gesetzlichen Rentenversicherung
  - Pension
  - Betriebliche oder öffentliche Zusatzversorgung
  - Grundsicherung im Alter/Sozialhilfe
  - Wohngeld
  - Leistungen der Pflegeversicherung
  - Sonstige, und zwar: .....

**27. Alle monatlichen Einkünfte in meinem Haushalt zusammengekommen, bleibt nach Abzug von Steuern und Beiträgen zur Renten-, Kranken-, Pflege- und Arbeitslosenversicherung noch folgender Betrag übrig:**  
*(Bitte nur ein Kreuz!)*

- |                                                  |                                                  |
|--------------------------------------------------|--------------------------------------------------|
| <input type="checkbox"/> Bis unter 900€          | <input type="checkbox"/> 2.000€ bis unter 2.600€ |
| <input type="checkbox"/> 900 bis unter 1.300€    | <input type="checkbox"/> 2.600€ bis unter 3.200€ |
| <input type="checkbox"/> 1.300€ bis unter 1.500€ | <input type="checkbox"/> 3.200€ bis unter 4.500€ |
| <input type="checkbox"/> 1.500€ bis unter 2.000€ | <input type="checkbox"/> 4.500€ und mehr         |

**In meinem Haushalt leben, mich selbst eingerechnet, ..... Personen** *(Anzahl eintragen).*

**28. Sonstige Anregungen oder Wünsche möchte ich noch mitteilen:**

.....

.....

.....

.....

.....

.....

**Herzlichen Dank für Ihre Teilnahme!**
